# Supplementary material for: Active and passive soil organic carbon pools as affected by different land use types in Mizoram, Northeast India
Source: PLoS One. 2019 Jul 30;14(7):e0219969. doi: 10.1371/journal.pone.0219969 (PMC6667142; doi:10.1371/journal.pone.0219969)
Supplement: S1 File — (XLSX) [file pone.0219969.s001.xlsx]

## Sheet: Agroforestry
						12 N H2SO4	18 N H2SO4	24 N H2SO4	CHN Analyzer	Dilute HCL
Major LU	LU Type	AE Zone	Site		FSS	SET 1	SET 2	SET 3	TC	SIC	TOC	V Labile	Labile	Less Labile	Non Labile	TOC Stock	TC Stock	SIC Stock	BD	TC	SIC	TOC	V Labile	Labile	Less Labile	Non Labile	TOC Stock	TC Stock	SIC Stock
Agroforestry	OHG	Humid Mild Tropical	Bairabi	0-15	7.76144	1.2546	1.8666	2.4174	3.4382	0.378202	3.06	1.2546	0.612	0.5508	0.6426	23.75	26.6854	2.93539
Agroforestry	OHG	Humid Mild Tropical	Bairabi	0-15	7.76344	1.2834	1.8135	2.3994	3.03261	0.242609	2.79	1.2834	0.5301	0.5859	0.3906	21.66	23.5435	1.88348
Agroforestry	OHG	Humid Mild Tropical	Bairabi	0-15	7.76238	1.3635	2.0301	2.5149	3.25806	0.228065	3.03	1.3635	0.6666	0.4848	0.5151	23.52	25.2903	1.77032	7.76242	3.24296	0.282958	2.96	1.3005	0.6029	0.5405	0.5161	22.9767	25.1731	2.1964
Agroforestry	OHG	Humid Mild Tropical	Bairabi	15-30	8.43902	0.8364	1.2546	1.845	2.7033	0.243297	2.46	0.8364	0.4182	0.5904	0.615	20.76	22.8132	2.05319
Agroforestry	OHG	Humid Mild Tropical	Bairabi	15-30	8.44156	0.8547	1.1319	1.3629	2.48387	0.173871	2.31	0.8547	0.2772	0.231	0.9471	19.5	20.9677	1.46774
Agroforestry	OHG	Humid Mild Tropical	Bairabi	15-30	8.44186	0.9288	1.3416	1.6254	2.96552	0.385517	2.58	0.9288	0.4128	0.2838	0.9546	21.78	25.0345	3.25448	8.44081	2.71756	0.267562	2.45	0.8733	0.3694	0.3684	0.8389	20.68	22.9385	2.25847
Agroforestry	OHG	Humid Mild Tropical	Bairabi	30-45	9.03175	0.7182	1.134	1.6065	2.1236	0.233596	1.89	0.7182	0.4158	0.4725	0.2835	17.07	19.1798	2.10978
Agroforestry	OHG	Humid Mild Tropical	Bairabi	30-45	9.02985	0.9045	1.4271	1.7889	2.28409	0.274091	2.01	0.9045	0.5226	0.3618	0.2211	18.15	20.625	2.475
Agroforestry	OHG	Humid Mild Tropical	Bairabi	30-45	9.03226	0.6696	1.0974	1.4508	2.02174	0.161739	1.86	0.6696	0.4278	0.3534	0.4092	16.8	18.2609	1.46087	9.03128	2.14314	0.223142	1.92	0.7641	0.4554	0.3959	0.3046	17.34	19.3552	2.01521	60.9967	67.4668	6.47008
Agroforestry	OHG	Temperate Sub Alpine	Champhai	0-15	12.7136	0.9798	1.5123	2.0022	2.24211	0.112105	2.13	0.9798	0.5325	0.4899	0.1278	27.08	28.5053	1.42526
Agroforestry	OHG	Temperate Sub Alpine	Champhai	0-15	12.7172	0.891	1.3068	1.7226	2.12903	0.149032	1.98	0.891	0.4158	0.4158	0.2574	25.18	27.0753	1.89527
Agroforestry	OHG	Temperate Sub Alpine	Champhai	0-15	12.7156	0.945	1.26	1.62	2.5	0.25	2.25	0.945	0.315	0.36	0.63	28.61	31.7889	3.17889	12.7154	2.29038	0.170379	2.12	0.9386	0.4211	0.4219	0.3384	26.9567	29.1231	2.16647
Agroforestry	OHG	Temperate Sub Alpine	Champhai	15-30	12.4872	0.4797	0.6201	0.7488	1.31461	0.144607	1.17	0.4797	0.1404	0.1287	0.4212	14.61	16.4157	1.80573
Agroforestry	OHG	Temperate Sub Alpine	Champhai	15-30	12.4884	0.5031	0.7353	1.0449	1.46591	0.175909	1.29	0.5031	0.2322	0.3096	0.2451	16.11	18.3068	2.19682
Agroforestry	OHG	Temperate Sub Alpine	Champhai	15-30	12.4815	0.567	0.7965	1.215	1.42105	0.0710526	1.35	0.567	0.2295	0.4185	0.135	16.85	17.7368	0.886842	12.4857	1.40052	0.130523	1.27	0.5166	0.2007	0.2856	0.2671	15.8567	17.4865	1.6298	60.1533	65.9648	5.81149
Agroforestry	OHG	Temperate Sub Alpine	Champhai	30-45	12.7091	0.66	1.1385	1.5675	1.94118	0.291176	1.65	0.66	0.4785	0.429	0.0825	20.97	24.6706	3.70059
Agroforestry	OHG	Temperate Sub Alpine	Champhai	30-45	12.7091	0.5775	0.9075	1.386	1.81319	0.163187	1.65	0.5775	0.33	0.4785	0.264	20.97	23.044	2.07396
Agroforestry	OHG	Temperate Sub Alpine	Champhai	30-45	12.7059	0.6579	0.8874	1.1934	1.68132	0.151319	1.53	0.6579	0.2295	0.306	0.3366	19.44	21.3626	1.92264	12.708	1.81189	0.201894	1.61	0.6318	0.346	0.4045	0.2277	20.46	23.0257	2.56573
Agroforestry	YHG	Temperate Sub Alpine	Champhai	0-15	10.4972	0.7257	1.1505	1.5753	2.01136	0.241364	1.77	0.7257	0.4248	0.4248	0.1947	18.58	21.1136	2.53364
Agroforestry	YHG	Temperate Sub Alpine	Champhai	0-15	10.4973	0.7503	1.1163	1.4457	2.05618	0.22618	1.83	0.7503	0.366	0.3294	0.3843	19.21	21.5843	2.37427
Agroforestry	YHG	Temperate Sub Alpine	Champhai	0-15	10.4971	0.7353	1.0431	1.2825	1.83871	0.12871	1.71	0.7353	0.3078	0.2394	0.4275	17.95	19.3011	1.35108	10.4972	1.96875	0.198751	1.77	0.7371	0.3662	0.3312	0.3355	18.58	20.6663	2.08633
Agroforestry	YHG	Temperate Sub Alpine	Champhai	15-30	10.7879	0.7524	1.0098	1.2276	2.2	0.22	1.98	0.7524	0.2574	0.2178	0.7524	21.36	23.7333	2.37333
Agroforestry	YHG	Temperate Sub Alpine	Champhai	15-30	10.7884	0.7371	1.0395	1.323	2.03226	0.142258	1.89	0.7371	0.3024	0.2835	0.567	20.39	21.9247	1.53473
Agroforestry	YHG	Temperate Sub Alpine	Champhai	15-30	10.7889	0.522	0.792	1.17	2	0.2	1.8	0.522	0.27	0.378	0.63	19.42	21.5778	2.15778	10.7884	2.07742	0.187419	1.89	0.6705	0.2766	0.2931	0.6498	20.39	22.4119	2.02195
Agroforestry	YHG	Temperate Sub Alpine	Champhai	30-45	11.1667	0.387	0.522	0.693	0.947368	0.0473684	0.9	0.387	0.135	0.171	0.207	10.05	10.5789	0.528947
Agroforestry	YHG	Temperate Sub Alpine	Champhai	30-45	11.1613	0.4185	0.5766	0.7533	1	0.07	0.93	0.4185	0.1581	0.1767	0.1767	10.38	11.1613	0.78129
Agroforestry	YHG	Temperate Sub Alpine	Champhai	30-45	11.1613	0.4185	0.7161	0.9951	1	0.07	0.93	0.4185	0.2976	0.279	-0.0651	10.38	11.1613	0.78129	11.1631	0.982456	0.0624561	0.92	0.408	0.1969	0.2089	0.1062	10.27	10.9672	0.697176	49.24	54.0455	4.80545
Agroforestry	YHG	Humid Mild Tropical	Sairang	0-15	9.36879	0.6486	0.9024	1.1562	1.51613	0.106129	1.41	0.6486	0.2538	0.2538	0.2538	13.21	14.2043	0.994301
Agroforestry	YHG	Humid Mild Tropical	Sairang	0-15	9.37255	0.6426	0.918	1.1934	1.73864	0.208636	1.53	0.6426	0.2754	0.2754	0.3366	14.34	16.2955	1.95545
Agroforestry	YHG	Humid Mild Tropical	Sairang	0-15	9.37037	0.7614	1.1502	1.4904	1.90588	0.285882	1.62	0.7614	0.3888	0.3402	0.1296	15.18	17.8588	2.67882	9.37057	1.72022	0.200216	1.52	0.6842	0.306	0.2898	0.24	14.2433	16.1195	1.87619
Agroforestry	YHG	Humid Mild Tropical	Sairang	15-30	9.22222	0.351	0.5967	0.9594	1.28571	0.115714	1.17	0.351	0.2457	0.3627	0.2106	10.79	11.8571	1.06714
Agroforestry	YHG	Humid Mild Tropical	Sairang	15-30	9.22481	0.4902	0.7353	1.032	1.3871	0.0970968	1.29	0.4902	0.2451	0.2967	0.258	11.9	12.7957	0.895699
Agroforestry	YHG	Humid Mild Tropical	Sairang	15-30	9.22404	0.6771	0.915	1.4457	2.15294	0.322941	1.83	0.6771	0.2379	0.5307	0.3843	16.88	19.8588	2.97882	9.22369	1.60858	0.178584	1.43	0.5061	0.2429	0.3967	0.2843	13.19	14.8372	1.64722
Agroforestry	YHG	Humid Mild Tropical	Sairang	30-45	9.10753	0.3627	0.5208	0.6882	1.01087	0.0808696	0.93	0.3627	0.1581	0.1674	0.2418	8.47	9.20652	0.736522
Agroforestry	YHG	Humid Mild Tropical	Sairang	30-45	9.10753	0.3627	0.5115	0.6882	1.0814	0.151395	0.93	0.3627	0.1488	0.1767	0.2418	8.47	9.84884	1.37884
Agroforestry	YHG	Humid Mild Tropical	Sairang	30-45	9.11594	0.2829	0.4554	0.6279	0.726316	0.0363158	0.69	0.2829	0.1725	0.1725	0.0621	6.29	6.62105	0.331053	9.11033	0.939527	0.0895269	0.85	0.3361	0.1598	0.1722	0.1819	7.74333	8.5588	0.815471	35.1767	39.5156	4.33889
Agroforestry	OHG	Humid Sub Tropical	Sakawrtuichaun	0-15	9.64734	0.8487	1.2627	1.5525	2.37931	0.30931	2.07	0.8487	0.414	0.2898	0.5175	19.97	22.954	2.98402
Agroforestry	OHG	Humid Sub Tropical	Sakawrtuichaun	0-15	9.64865	0.9546	1.3986	1.7982	2.5814	0.361395	2.22	0.9546	0.444	0.3996	0.4218	21.42	24.907	3.48698
Agroforestry	OHG	Humid Sub Tropical	Sakawrtuichaun	0-15	9.65	1.056	1.416	1.92	2.66667	0.266667	2.4	1.056	0.36	0.504	0.48	23.16	25.7333	2.57333	9.64866	2.54246	0.312457	2.23	0.9531	0.406	0.3978	0.4731	21.5167	24.5314	3.01478
Agroforestry	OHG	Humid Sub Tropical	Sakawrtuichaun	15-30	9.66667	0.7503	1.0431	1.5555	2.12791	0.297907	1.83	0.7503	0.2928	0.5124	0.2745	17.69	20.5698	2.87977
Agroforestry	OHG	Humid Sub Tropical	Sakawrtuichaun	15-30	9.66667	0.51	0.69	1.005	1.70455	0.204545	1.5	0.51	0.18	0.315	0.495	14.5	16.4773	1.97727
Agroforestry	OHG	Humid Sub Tropical	Sakawrtuichaun	15-30	9.66667	0.6816	1.0224	1.4058	2.50588	0.375882	2.13	0.6816	0.3408	0.3834	0.7242	20.59	24.2235	3.63353	9.66667	2.11278	0.292778	1.82	0.6473	0.2712	0.4036	0.4979	17.5933	20.4235	2.83019
Agroforestry	OHG	Humid Sub Tropical	Sakawrtuichaun	30-45	9.60667	0.57	1.05	1.44	1.64835	0.148352	1.5	0.57	0.48	0.39	0.06	14.41	15.8352	1.42516
Agroforestry	OHG	Humid Sub Tropical	Sakawrtuichaun	30-45	9.60544	0.588	0.882	1.3083	1.67045	0.200455	1.47	0.588	0.294	0.4263	0.1617	14.12	16.0455	1.92545
Agroforestry	OHG	Humid Sub Tropical	Sakawrtuichaun	30-45	9.60741	0.4995	0.7155	1.0125	1.42105	0.0710526	1.35	0.4995	0.216	0.297	0.3375	12.97	13.6526	0.682632	9.60651	1.57995	0.139953	1.44	0.5525	0.33	0.3711	0.1864	13.8333	15.1778	1.34442	52.9433	60.1327	7.18938
Agroforestry	YHG	Humid Sub Tropical	Tanhril	0-15	9.28814	0.7434	1.1505	1.416	1.94505	0.175055	1.77	0.7434	0.4071	0.2655	0.354	16.44	18.0659	1.62593
Agroforestry	YHG	Humid Sub Tropical	Tanhril	0-15	9.29012	0.6804	0.891	1.2798	1.70526	0.0852632	1.62	0.6804	0.2106	0.3888	0.3402	15.05	15.8421	0.792105
Agroforestry	YHG	Humid Sub Tropical	Tanhril	0-15	9.28931	0.6519	1.0494	1.272	1.76667	0.176667	1.59	0.6519	0.3975	0.2226	0.318	14.77	16.4111	1.64111	9.28919	1.80566	0.145662	1.66	0.6919	0.3384	0.2923	0.3374	15.42	16.7731	1.35305
Agroforestry	YHG	Humid Sub Tropical	Tanhril	15-30	10.2047	0.513	0.8379	1.2996	1.94318	0.233182	1.71	0.513	0.3249	0.4617	0.4104	17.45	19.8295	2.37955
Agroforestry	YHG	Humid Sub Tropical	Tanhril	15-30	10.2056	0.738	1.098	1.512	1.97802	0.178022	1.8	0.738	0.36	0.414	0.288	18.37	20.1868	1.81681
Agroforestry	YHG	Humid Sub Tropical	Tanhril	15-30	10.2061	0.6105	0.957	1.188	1.77419	0.124194	1.65	0.6105	0.3465	0.231	0.462	16.84	18.1075	1.26753	10.2054	1.89847	0.178466	1.72	0.6205	0.3438	0.3689	0.3868	17.5533	19.3746	1.8213
Agroforestry	YHG	Humid Sub Tropical	Tanhril	30-45	9.9902	0.3672	0.6018	0.9078	1.14607	0.126067	1.02	0.3672	0.2346	0.306	0.1122	10.19	11.4494	1.25944
Agroforestry	YHG	Humid Sub Tropical	Tanhril	30-45	9.99099	0.4329	0.6771	0.8991	1.30588	0.195882	1.11	0.4329	0.2442	0.222	0.2109	11.09	13.0471	1.95706
Agroforestry	YHG	Humid Sub Tropical	Tanhril	30-45	9.9902	0.4386	0.6528	0.8874	1.09677	0.0767742	1.02	0.4386	0.2142	0.2346	0.1326	10.19	10.957	0.766989	9.99046	1.18291	0.132908	1.05	0.4129	0.231	0.2542	0.1519	10.49	11.8178	1.32783	43.4633	47.9655	4.50217

## Sheet: Current Jhum
						12 N H2SO4	18 N H2SO4	24 N H2SO4	CHN Analyzer	Dilute HCL
Major LU	LU Type	AE Zone	Site		FSS	SET 1	SET 2	SET 3	TC	SIC	TOC	V Labile	Labile	Less Labile	Non Labile	TOC Stock	TC Stock	SIC Stock	BD	TC	SIC	TOC	V Labile	Labile	Less Labile	Non Labile	TOC Stock	TC Stock	SIC Stock
Current Jhum	CJ	Humid Mild Tropical	Dampa	0-15	6.36066	0.8052	1.2078	1.464	2.03333	0.203333	1.83	0.8052	0.4026	0.2562	0.366	11.64	12.9333	1.29333
Current Jhum	CJ	Humid Mild Tropical	Dampa	0-15	6.36508	0.8505	1.1529	1.4175	2.19767	0.307674	1.89	0.8505	0.3024	0.2646	0.4725	12.03	13.9884	1.95837
Current Jhum	CJ	Humid Mild Tropical	Dampa	0-15	6.36318	0.8241	1.2261	1.6482	2.33721	0.327209	2.01	0.8241	0.402	0.4221	0.3618	12.79	14.8721	2.08209	6.36297	2.18941	0.279406	1.91	0.8266	0.369	0.3143	0.4001	12.1533	13.9313	1.77793
Current Jhum	CJ	Humid Mild Tropical	Dampa	15-30	5.83636	0.6765	0.99	1.3035	1.79348	0.143478	1.65	0.6765	0.3135	0.3135	0.3465	9.63	10.4674	0.837391
Current Jhum	CJ	Humid Mild Tropical	Dampa	15-30	5.8366	0.6273	0.8721	1.1322	1.8	0.27	1.53	0.6273	0.2448	0.2601	0.3978	8.93	10.5059	1.57588
Current Jhum	CJ	Humid Mild Tropical	Dampa	15-30	5.83929	0.504	0.84	1.176	1.84615	0.166154	1.68	0.504	0.336	0.336	0.504	9.81	10.7802	0.97022	5.83742	1.81321	0.193211	1.62	0.6026	0.2981	0.3032	0.4161	9.45667	10.5845	1.12783
Current Jhum	CJ	Humid Mild Tropical	Dampa	30-45	4.92857	0.5418	0.9324	1.1844	1.38462	0.124615	1.26	0.5418	0.3906	0.252	0.0756	6.21	6.82418	0.614176
Current Jhum	CJ	Humid Mild Tropical	Dampa	30-45	4.92908	0.5922	0.9588	1.2267	1.62069	0.21069	1.41	0.5922	0.3666	0.2679	0.1833	6.95	7.98851	1.03851
Current Jhum	CJ	Humid Mild Tropical	Dampa	30-45	4.93333	0.444	0.72	1.056	1.41176	0.211765	1.2	0.444	0.276	0.336	0.144	5.92	6.96471	1.04471	4.93033	1.47236	0.182357	1.29	0.526	0.3444	0.2853	0.1343	6.36	7.25913	0.899129	27.97	31.7749	3.80489
Current Jhum	CJ	Temperate Sub Alpine	Lungzarthum	0-15	4.80637	1.6728	2.4888	3.4272	4.34043	0.260426	4.08	1.6728	0.816	0.9384	0.6528	19.61	20.8617	1.2517
Current Jhum	CJ	Temperate Sub Alpine	Lungzarthum	0-15	4.80615	1.9035	2.5803	3.1725	4.80682	0.576818	4.23	1.9035	0.6768	0.5922	1.0575	20.33	23.1023	2.77227
Current Jhum	CJ	Temperate Sub Alpine	Lungzarthum	0-15	4.80676	1.7388	2.7324	3.3948	4.54945	0.409451	4.14	1.7388	0.9936	0.6624	0.7452	19.9	21.8681	1.96813	4.80643	4.56556	0.415565	4.15	1.7717	0.8288	0.731	0.8185	19.9467	21.944	1.99737
Current Jhum	CJ	Temperate Sub Alpine	Lungzarthum	15-30	4.59021	1.1118	1.6023	2.5179	3.71591	0.445909	3.27	1.1118	0.4905	0.9156	0.7521	15.01	17.0568	2.04682
Current Jhum	CJ	Temperate Sub Alpine	Lungzarthum	15-30	4.59091	1.386	2.013	2.838	3.70787	0.407865	3.3	1.386	0.627	0.825	0.462	15.15	17.0225	1.87247
Current Jhum	CJ	Temperate Sub Alpine	Lungzarthum	15-30	4.5904	1.3806	2.0886	2.5134	4.02273	0.482727	3.54	1.3806	0.708	0.4248	1.0266	16.25	18.4659	2.21591	4.59051	3.8155	0.445501	3.37	1.2928	0.6085	0.7218	0.7469	15.47	17.5151	2.04507
Current Jhum	CJ	Temperate Sub Alpine	Lungzarthum	30-45	4.40104	0.8256	1.3632	1.824	2.02105	0.101053	1.92	0.8256	0.5376	0.4608	0.096	8.45	8.89474	0.444737
Current Jhum	CJ	Temperate Sub Alpine	Lungzarthum	30-45	4.40212	0.7749	1.2852	1.6443	2.14773	0.257727	1.89	0.7749	0.5103	0.3591	0.2457	8.32	9.45455	1.13455
Current Jhum	CJ	Temperate Sub Alpine	Lungzarthum	30-45	4.40323	0.651	0.9486	1.4508	2.08989	0.229888	1.86	0.651	0.2976	0.5022	0.4092	8.19	9.20225	1.01225	4.40213	2.08622	0.196223	1.89	0.7505	0.4485	0.4407	0.2503	8.32	9.18384	0.863843	43.7367	48.6429	4.90628
Current Jhum	CJ	Humid Sub Tropical	Sakawrtuichaun	0-15	8.02778	0.6336	0.8208	1.0656	1.63636	0.196364	1.44	0.6336	0.1872	0.2448	0.3744	11.56	13.1364	1.57636
Current Jhum	CJ	Humid Sub Tropical	Sakawrtuichaun	0-15	8.02721	0.6468	0.9702	1.3083	1.67045	0.200455	1.47	0.6468	0.3234	0.3381	0.1617	11.8	13.4091	1.60909
Current Jhum	CJ	Humid Sub Tropical	Sakawrtuichaun	0-15	8.02667	0.705	0.915	1.185	1.6129	0.112903	1.5	0.705	0.21	0.27	0.315	12.04	12.9462	0.906237	8.02722	1.63991	0.169907	1.47	0.6618	0.2402	0.2843	0.2837	11.8	13.1639	1.3639
Current Jhum	CJ	Humid Sub Tropical	Sakawrtuichaun	15-30	7.91429	0.3255	0.4725	0.714	1.17978	0.129775	1.05	0.3255	0.147	0.2415	0.336	8.31	9.33708	1.02708
Current Jhum	CJ	Humid Sub Tropical	Sakawrtuichaun	15-30	7.90991	0.3108	0.4884	0.6327	1.20652	0.0965217	1.11	0.3108	0.1776	0.1443	0.4773	8.78	9.54348	0.763478
Current Jhum	CJ	Humid Sub Tropical	Sakawrtuichaun	15-30	7.91667	0.3936	0.5088	0.7296	1.07865	0.118652	0.96	0.3936	0.1152	0.2208	0.2304	7.6	8.53933	0.939326	7.91362	1.15498	0.114983	1.04	0.3433	0.1466	0.2022	0.3479	8.23	9.13996	0.909961
Current Jhum	CJ	Humid Sub Tropical	Sakawrtuichaun	30-45	7.8642	0.2997	0.4212	0.6156	0.94186	0.13186	0.81	0.2997	0.1215	0.1944	0.1944	6.37	7.40698	1.03698
Current Jhum	CJ	Humid Sub Tropical	Sakawrtuichaun	30-45	7.86458	0.336	0.5472	0.816	1.09091	0.130909	0.96	0.336	0.2112	0.2688	0.144	7.55	8.57955	1.02955
Current Jhum	CJ	Humid Sub Tropical	Sakawrtuichaun	30-45	7.8642	0.3483	0.5832	0.7857	0.920455	0.110455	0.81	0.3483	0.2349	0.2025	0.0243	6.37	7.23864	0.868636	7.86433	0.984408	0.124408	0.86	0.328	0.1892	0.2219	0.1209	6.76333	7.74172	0.978386	26.7933	30.0456	3.25224

## Sheet: Forest
						12 N H2SO4	18 N H2SO4	24 N H2SO4	CHN Analyzer	Dilute HCL
Major LU	LU Type	AE Zone	Site		FSS	SET 1	SET 2	SET 3	TC	SIC	TOC	V Labile	Labile	Less Labile	Non Labile	TOC Stock	TC Stock	SIC Stock	BD	TC	SIC	TOC	V Labile	Labile	Less Labile	Non Labile	TOC Stock	TC Stock	SIC Stock
Forest	DF	Humid Mild Tropical	Dampa	0-15	7.79538	2.6058	3.3936	4.9086	7.12941	1.06941	6.06	2.6058	0.7878	1.515	1.1514	47.24	55.5765	8.33647
Forest	DF	Humid Mild Tropical	Dampa	0-15	7.79512	2.583	3.5055	4.797	6.54255	0.392553	6.15	2.583	0.9225	1.2915	1.353	47.94	51	3.06
Forest	DF	Humid Mild Tropical	Dampa	0-15	7.79575	2.5092	3.6108	4.6512	6.58065	0.460645	6.12	2.5092	1.1016	1.0404	1.4688	47.71	51.3011	3.59108	7.79542	6.75087	0.64087	6.11	2.566	0.9373	1.2823	1.3244	47.63	52.6258	4.99585
Forest	DF	Humid Mild Tropical	Dampa	15-30	6.82171	1.8576	2.6316	3.612	6	0.84	5.16	1.8576	0.774	0.9804	1.548	35.2	40.9302	5.73023
Forest	DF	Humid Mild Tropical	Dampa	15-30	6.82157	1.581	2.397	3.876	5.36842	0.268421	5.1	1.581	0.816	1.479	1.224	34.79	36.6211	1.83105
Forest	DF	Humid Mild Tropical	Dampa	15-30	6.82081	1.9203	2.9064	4.3077	5.76667	0.576667	5.19	1.9203	0.9861	1.4013	0.8823	35.4	39.3333	3.93333	6.82136	5.7117	0.561696	5.15	1.7863	0.8587	1.2869	1.2181	35.13	38.9615	3.83154	82.76	91.5874	8.82739
Forest	DF	Humid Mild Tropical	Dampa	30-45	7.42708	1.0944	1.9584	2.592	3.27273	0.392727	2.88	1.0944	0.864	0.6336	0.288	21.39	24.3068	2.91682
Forest	DF	Humid Mild Tropical	Dampa	30-45	7.42807	1.0545	1.8525	2.679	3.27586	0.425862	2.85	1.0545	0.798	0.8265	0.171	21.17	24.3333	3.16333
Forest	DF	Humid Mild Tropical	Dampa	30-45	7.42708	1.1232	1.9872	2.5056	3.13043	0.250435	2.88	1.1232	0.864	0.5184	0.3744	21.39	23.25	1.86	7.42741	3.22634	0.356341	2.87	1.0907	0.842	0.6595	0.2778	21.3167	23.9634	2.64672
Forest	OF	Humid Mild Tropical	Dampa	0-15	9.65766	1.0434	1.554	1.887	2.3617	0.141702	2.22	1.0434	0.5106	0.333	0.333	21.44	22.8085	1.36851
Forest	OF	Humid Mild Tropical	Dampa	0-15	9.65753	1.0074	1.3797	1.9053	2.40659	0.216593	2.19	1.0074	0.3723	0.5256	0.2847	21.15	23.2418	2.09176
Forest	OF	Humid Mild Tropical	Dampa	0-15	9.65789	1.0488	1.482	1.938	2.59091	0.310909	2.28	1.0488	0.4332	0.456	0.342	22.02	25.0227	3.00273	9.6577	2.45307	0.223068	2.23	1.0332	0.4387	0.4382	0.3199	21.5367	23.691	2.15433
Forest	OF	Humid Mild Tropical	Dampa	15-30	9.33333	0.6426	0.8694	1.0773	2.03226	0.142258	1.89	0.6426	0.2268	0.2079	0.8127	17.64	18.9677	1.32774
Forest	OF	Humid Mild Tropical	Dampa	15-30	9.33333	0.5544	0.8712	1.287	2.30233	0.322326	1.98	0.5544	0.3168	0.4158	0.693	18.48	21.4884	3.00837
Forest	OF	Humid Mild Tropical	Dampa	15-30	9.33333	0.546	0.78	0.9945	2.26744	0.317442	1.95	0.546	0.234	0.2145	0.9555	18.2	21.1628	2.96279	9.33333	2.20068	0.260675	1.94	0.581	0.2592	0.2794	0.8204	18.1067	20.5396	2.43297
Forest	OF	Humid Mild Tropical	Dampa	30-45	9.42105	0.6327	1.1799	1.5048	2.01176	0.301765	1.71	0.6327	0.5472	0.3249	0.2052	16.11	18.9529	2.84294
Forest	OF	Humid Mild Tropical	Dampa	30-45	9.42105	0.7695	1.2141	1.6587	1.92135	0.211348	1.71	0.7695	0.4446	0.4446	0.0513	16.11	18.1011	1.99112
Forest	OF	Humid Mild Tropical	Dampa	30-45	9.42308	0.6396	0.9672	1.248	1.67742	0.117419	1.56	0.6396	0.3276	0.2808	0.312	14.7	15.8065	1.10645	9.42173	1.87018	0.210177	1.66	0.6806	0.4398	0.3501	0.1895	15.64	17.6202	1.98017	55.2833	61.8508	6.56747
Forest	DF	Temperate Sub Alpine	Farpak	0-15	4.33688	2.5944	3.3276	4.4556	6.63529	0.995294	5.64	2.5944	0.7332	1.128	1.1844	24.46	28.7765	4.31647
Forest	DF	Temperate Sub Alpine	Farpak	0-15	4.33692	2.3994	3.7944	5.1894	6.41379	0.833793	5.58	2.3994	1.395	1.395	0.3906	24.2	27.8161	3.61609
Forest	DF	Temperate Sub Alpine	Farpak	0-15	4.3369	2.3001	3.5904	4.9368	6.30337	0.693371	5.61	2.3001	1.2903	1.3464	0.6732	24.33	27.3371	3.00708	4.3369	6.45082	0.840819	5.61	2.4313	1.1395	1.2898	0.7494	24.33	27.9765	3.64655
Forest	DF	Temperate Sub Alpine	Farpak	15-30	3.93617	1.3959	2.2842	3.4686	4.54839	0.318387	4.23	1.3959	0.8883	1.1844	0.7614	16.65	17.9032	1.25323
Forest	DF	Temperate Sub Alpine	Farpak	15-30	3.93706	1.287	2.1879	2.7027	4.875	0.585	4.29	1.287	0.9009	0.5148	1.5873	16.89	19.1932	2.30318
Forest	DF	Temperate Sub Alpine	Farpak	15-30	3.93765	1.3761	1.9599	2.3769	4.63333	0.463333	4.17	1.3761	0.5838	0.417	1.7931	16.42	18.2444	1.82444	3.93696	4.68557	0.455573	4.23	1.353	0.791	0.7054	1.3806	16.6533	18.447	1.79362	56.6233	64.0437	7.42034
Forest	DF	Temperate Sub Alpine	Farpak	30-45	3.6484	0.8979	1.3578	1.8615	2.35484	0.164839	2.19	0.8979	0.4599	0.5037	0.3285	7.99	8.5914	0.601398
Forest	DF	Temperate Sub Alpine	Farpak	30-45	3.65	0.84	1.368	1.968	2.6087	0.208696	2.4	0.84	0.528	0.6	0.432	8.76	9.52174	0.761739
Forest	DF	Temperate Sub Alpine	Farpak	30-45	3.65	0.864	1.368	1.92	2.6087	0.208696	2.4	0.864	0.504	0.552	0.48	8.76	9.52174	0.761739	3.64947	2.52408	0.194077	2.33	0.8673	0.4973	0.5519	0.4135	8.50333	9.21163	0.708292
Forest	OF	Temperate Sub Alpine	Farpak	0-15	4.66667	1.3596	2.0394	2.472	3.28723	0.197234	3.09	1.3596	0.6798	0.4326	0.618	14.42	15.3404	0.920426
Forest	OF	Temperate Sub Alpine	Farpak	0-15	4.66667	1.2804	1.7751	2.4444	3.06316	0.153158	2.91	1.2804	0.4947	0.6693	0.4656	13.58	14.2947	0.714737
Forest	OF	Temperate Sub Alpine	Farpak	0-15	4.66667	1.0701	1.7226	2.1402	3.07059	0.460588	2.61	1.0701	0.6525	0.4176	0.4698	12.18	14.3294	2.14941	4.66667	3.14033	0.270327	2.87	1.2367	0.609	0.5065	0.5178	13.3933	14.6549	1.26152
Forest	OF	Temperate Sub Alpine	Farpak	15-30	4.55172	0.5568	0.8004	1.1136	2	0.26	1.74	0.5568	0.2436	0.3132	0.6264	7.92	9.10345	1.18345
Forest	OF	Temperate Sub Alpine	Farpak	15-30	4.54971	0.513	0.8208	1.0773	1.87912	0.169121	1.71	0.513	0.3078	0.2565	0.6327	7.78	8.54945	0.769451
Forest	OF	Temperate Sub Alpine	Farpak	15-30	4.55556	0.4428	0.6696	0.7992	1.22727	0.147273	1.08	0.4428	0.2268	0.1296	0.2808	4.92	5.59091	0.670909	4.55233	1.70213	0.192131	1.51	0.5042	0.2594	0.2331	0.5133	6.87333	7.74794	0.874603
Forest	OF	Temperate Sub Alpine	Farpak	30-45	4.45752	0.5814	0.8415	1.2087	1.61053	0.0805263	1.53	0.5814	0.2601	0.3672	0.3213	6.82	7.17895	0.358947
Forest	OF	Temperate Sub Alpine	Farpak	30-45	4.46296	0.4428	0.6156	0.9288	1.27059	0.190588	1.08	0.4428	0.1728	0.3132	0.1512	4.82	5.67059	0.850588
Forest	OF	Temperate Sub Alpine	Farpak	30-45	4.46154	0.4446	0.819	1.1349	1.3	0.13	1.17	0.4446	0.3744	0.3159	0.0351	5.22	5.8	0.58	4.46067	1.3937	0.133705	1.26	0.4896	0.2691	0.3321	0.1692	5.62	6.21651	0.596512	25.8867	28.6193	2.73264
Forest	DF	Humid Sub Tropical	Reiek	0-15	6.01404	1.197	1.71	2.394	3.06452	0.214516	2.85	1.197	0.513	0.684	0.456	17.14	18.4301	1.29011
Forest	DF	Humid Sub Tropical	Reiek	0-15	6.01515	1.1616	1.6896	2.2704	2.93333	0.293333	2.64	1.1616	0.528	0.5808	0.3696	15.88	17.6444	1.76444
Forest	DF	Humid Sub Tropical	Reiek	0-15	6.01481	1.161	1.809	2.241	2.93478	0.234783	2.7	1.161	0.648	0.432	0.459	16.24	17.6522	1.41217	6.01467	2.97754	0.247544	2.73	1.1732	0.563	0.5656	0.4282	16.42	17.9089	1.48891
Forest	DF	Humid Sub Tropical	Reiek	15-30	5.97175	0.531	0.8496	1.1328	1.90323	0.133226	1.77	0.531	0.3186	0.2832	0.6372	10.57	11.3656	0.795591
Forest	DF	Humid Sub Tropical	Reiek	15-30	5.97268	0.6222	0.9882	1.5189	2.05618	0.22618	1.83	0.6222	0.366	0.5307	0.3111	10.93	12.2809	1.3509
Forest	DF	Humid Sub Tropical	Reiek	15-30	5.97175	0.5841	0.8496	1.0797	1.86316	0.0931579	1.77	0.5841	0.2655	0.2301	0.6903	10.57	11.1263	0.556316	5.97206	1.94085	0.150854	1.79	0.5791	0.3167	0.348	0.5462	10.69	11.5909	0.900935
Forest	DF	Humid Sub Tropical	Reiek	30-45	5.9386	0.4902	0.8436	1.1058	1.34118	0.201176	1.14	0.4902	0.3534	0.2622	0.0342	6.77	7.96471	1.19471
Forest	DF	Humid Sub Tropical	Reiek	30-45	5.93333	0.4995	0.8235	1.08	1.48352	0.133516	1.35	0.4995	0.324	0.2565	0.27	8.01	8.8022	0.792198
Forest	DF	Humid Sub Tropical	Reiek	30-45	5.93519	0.4536	0.7344	0.9396	1.21348	0.133483	1.08	0.4536	0.2808	0.2052	0.1404	6.41	7.20225	0.792247	5.93571	1.34606	0.156059	1.19	0.4811	0.3194	0.2413	0.1482	7.06333	7.98972	0.926384	34.1733	37.4896	3.31623
Forest	OF	Humid Sub Tropical	Tanhril	0-15	8.14583	1.3536	1.7568	2.4192	3.27273	0.392727	2.88	1.3536	0.4032	0.6624	0.4608	23.46	26.6591	3.19909
Forest	OF	Humid Sub Tropical	Tanhril	0-15	8.14583	1.1808	1.6704	2.2464	3.09677	0.216774	2.88	1.1808	0.4896	0.576	0.6336	23.46	25.2258	1.76581
Forest	OF	Humid Sub Tropical	Tanhril	0-15	8.14478	1.3662	2.1087	2.7918	3.375	0.405	2.97	1.3662	0.7425	0.6831	0.1782	24.19	27.4886	3.29864	8.14548	3.24817	0.338167	2.91	1.3002	0.5451	0.6405	0.4242	23.7033	26.4578	2.75451
Forest	OF	Humid Sub Tropical	Tanhril	15-30	7.54487	0.5928	0.8892	1.2948	1.65957	0.0995745	1.56	0.5928	0.2964	0.4056	0.2652	11.77	12.5213	0.751277
Forest	OF	Humid Sub Tropical	Tanhril	15-30	7.54	0.54	0.81	1.005	1.6129	0.112903	1.5	0.54	0.27	0.195	0.495	11.31	12.1613	0.85129
Forest	OF	Humid Sub Tropical	Tanhril	15-30	7.54088	0.5088	0.7791	1.2084	1.67368	0.0836842	1.59	0.5088	0.2703	0.4293	0.3816	11.99	12.6211	0.631053	7.54192	1.64872	0.0987206	1.55	0.5472	0.2789	0.3433	0.3806	11.69	12.4345	0.74454
Forest	OF	Humid Sub Tropical	Tanhril	30-45	8.43478	0.5796	0.9798	1.2696	1.51648	0.136484	1.38	0.5796	0.4002	0.2898	0.1104	11.64	12.7912	1.15121
Forest	OF	Humid Sub Tropical	Tanhril	30-45	8.43333	0.585	0.87	1.245	1.76471	0.264706	1.5	0.585	0.285	0.375	0.255	12.65	14.8824	2.23235
Forest	OF	Humid Sub Tropical	Tanhril	30-45	8.43056	0.6336	0.9216	1.3392	1.56522	0.125217	1.44	0.6336	0.288	0.4176	0.1008	12.14	13.1957	1.05565	8.43289	1.61547	0.175469	1.44	0.5994	0.3244	0.3608	0.1554	12.1433	13.6231	1.47974	47.5367	52.5155	4.97879

## Sheet: Grassland
Major LU	LU Type	AE Zone	Site		FSS	SET 1	SET 2	SET 3	TC	SIC	TOC	V Labile	Labile	Less Labile	Non Labile	TOC Stock	TC Stock	SIC Stock	BD	TC	SIC	TOC	V Labile	Labile	Less Labile	Non Labile	TOC Stock	TC Stock	SIC Stock
Grassland	GL	Temperate Sub Alpine	Farpak	0-15	7.68672	1.7556	2.5137	3.1122	4.24468	0.254681	3.99	1.7556	0.7581	0.5985	0.8778	30.67	32.6277	1.95766
Grassland	GL	Temperate Sub Alpine	Farpak	0-15	7.6849	1.5744	2.5344	3.072	4.17391	0.333913	3.84	1.5744	0.96	0.5376	0.768	29.51	32.0761	2.56609
Grassland	GL	Temperate Sub Alpine	Farpak	0-15	7.68504	1.7526	2.5527	3.3147	4.2809	0.470899	3.81	1.7526	0.8001	0.762	0.4953	29.28	32.8989	3.61888	7.68555	4.23316	0.353164	3.88	1.6942	0.8394	0.6327	0.7137	29.82	32.5342	2.71421
Grassland	GL	Temperate Sub Alpine	Farpak	15-30	6.97163	0.564	0.7473	1.0857	1.5	0.09	1.41	0.564	0.1833	0.3384	0.3243	9.83	10.4574	0.627447
Grassland	GL	Temperate Sub Alpine	Farpak	15-30	6.97163	0.4512	0.6486	0.9024	1.60227	0.192273	1.41	0.4512	0.1974	0.2538	0.5076	9.83	11.1705	1.34045
Grassland	GL	Temperate Sub Alpine	Farpak	15-30	6.97222	0.648	1.0584	1.5984	2.32258	0.162581	2.16	0.648	0.4104	0.54	0.5616	15.06	16.1935	1.13355	6.97183	1.80828	0.148284	1.66	0.5544	0.2637	0.3774	0.4645	11.5733	12.6071	1.03382
Grassland	GL	Temperate Sub Alpine	Farpak	30-45	6.83333	0.117	0.198	0.27	0.315789	0.0157895	0.3	0.117	0.081	0.072	0.03	2.05	2.15789	0.107895
Grassland	GL	Temperate Sub Alpine	Farpak	30-45	6.84058	0.2691	0.4554	0.621	0.734043	0.0440426	0.69	0.2691	0.1863	0.1656	0.069	4.72	5.02128	0.301277
Grassland	GL	Temperate Sub Alpine	Farpak	30-45	6.83333	0.1968	0.3216	0.432	0.539326	0.0593258	0.48	0.1968	0.1248	0.1104	0.048	3.28	3.68539	0.405393	6.83575	0.529719	0.0397193	0.49	0.1943	0.1307	0.116	0.049	3.35	3.62152	0.271522	44.7433	48.7629	4.01955
Grassland	GL	Humid Sub Tropical	Reiek	0-15	4.31159	0.6072	0.8556	1.1592	1.48387	0.103871	1.38	0.6072	0.2484	0.3036	0.2208	5.95	6.39785	0.447849
Grassland	GL	Humid Sub Tropical	Reiek	0-15	4.31111	0.594	0.81	1.0935	1.58824	0.238235	1.35	0.594	0.216	0.2835	0.2565	5.82	6.84706	1.02706
Grassland	GL	Humid Sub Tropical	Reiek	0-15	4.31624	0.5382	0.7605	0.9477	1.37647	0.206471	1.17	0.5382	0.2223	0.1872	0.2223	5.05	5.94118	0.891176	4.31298	1.48286	0.182859	1.3	0.5798	0.2289	0.2581	0.2332	5.60667	6.39536	0.788695
Grassland	GL	Humid Sub Tropical	Reiek	15-30	3.5625	0.288	0.4896	0.7296	1.09091	0.130909	0.96	0.288	0.2016	0.24	0.2304	3.42	3.88636	0.466364
Grassland	GL	Humid Sub Tropical	Reiek	15-30	3.55556	0.2511	0.3564	0.5994	0.931034	0.121034	0.81	0.2511	0.1053	0.243	0.2106	2.88	3.31034	0.430345
Grassland	GL	Humid Sub Tropical	Reiek	15-30	3.5625	0.2688	0.4032	0.6048	1.07865	0.118652	0.96	0.2688	0.1344	0.2016	0.3552	3.42	3.8427	0.422697	3.56019	1.03353	0.123532	0.91	0.2693	0.1471	0.2282	0.2654	3.24	3.6798	0.439802
Grassland	GL	Humid Sub Tropical	Reiek	30-45	3.40741	0.2268	0.3996	0.5292	0.580645	0.0406452	0.54	0.2268	0.1728	0.1296	0.0108	1.84	1.97849	0.138495
Grassland	GL	Humid Sub Tropical	Reiek	30-45	3.41667	0.228	0.39	0.564	0.631579	0.0315789	0.6	0.228	0.162	0.174	0.036	2.05	2.15789	0.107895
Grassland	GL	Humid Sub Tropical	Reiek	30-45	3.4127	0.2331	0.3339	0.5229	0.692308	0.0623077	0.63	0.2331	0.1008	0.189	0.1071	2.15	2.36264	0.212637	3.41226	0.634844	0.0448439	0.59	0.2293	0.1452	0.1642	0.0513	2.01333	2.16634	0.153009	10.86	12.2415	1.38151
Grassland	GL	Humid Mild Tropical	Thenzawl	0-15	9.11333	0.615	0.855	1.11	1.70455	0.204545	1.5	0.615	0.24	0.255	0.39	13.67	15.5341	1.86409
Grassland	GL	Humid Mild Tropical	Thenzawl	0-15	9.11628	0.5676	0.8127	1.0578	1.48276	0.192759	1.29	0.5676	0.2451	0.2451	0.2322	11.76	13.5172	1.75724
Grassland	GL	Humid Mild Tropical	Thenzawl	0-15	9.11806	0.6336	0.864	1.224	1.56522	0.125217	1.44	0.6336	0.2304	0.36	0.216	13.13	14.2717	1.14174	9.11589	1.58417	0.174174	1.41	0.6054	0.2385	0.2867	0.2794	12.8533	14.441	1.58769
Grassland	GL	Humid Mild Tropical	Thenzawl	15-30	9.22917	0.3936	0.5664	0.6624	1.07865	0.118652	0.96	0.3936	0.1728	0.096	0.2976	8.86	9.95506	1.09506
Grassland	GL	Humid Mild Tropical	Thenzawl	15-30	9.22549	0.2958	0.4284	0.6222	1.09677	0.0767742	1.02	0.2958	0.1326	0.1938	0.3978	9.41	10.1183	0.70828
Grassland	GL	Humid Mild Tropical	Thenzawl	15-30	9.23232	0.2772	0.4752	0.6237	1.08791	0.0979121	0.99	0.2772	0.198	0.1485	0.3663	9.14	10.044	0.903956	9.22899	1.08778	0.0977793	0.99	0.3222	0.1678	0.1461	0.3539	9.13667	10.0391	0.902431
Grassland	GL	Humid Mild Tropical	Thenzawl	30-45	8.92982	0.2166	0.3648	0.5073	0.612903	0.0429032	0.57	0.2166	0.1482	0.1425	0.0627	5.09	5.47312	0.383118
Grassland	GL	Humid Mild Tropical	Thenzawl	30-45	8.92754	0.2622	0.4761	0.6624	0.734043	0.0440426	0.69	0.2622	0.2139	0.1863	0.0276	6.16	6.55319	0.393191
Grassland	GL	Humid Mild Tropical	Thenzawl	30-45	8.92982	0.228	0.4104	0.5244	0.612903	0.0429032	0.57	0.228	0.1824	0.114	0.0456	5.09	5.47312	0.383118	8.92906	0.653283	0.043283	0.61	0.2356	0.1815	0.1476	0.0453	5.44667	5.83314	0.386476	27.4367	30.3133	2.8766

## Sheet: Jhum Fallow
						12 N H2SO4	18 N H2SO4	24 N H2SO4	CHN Analyzer	Dilute HCL
Major LU	LU Type	AE Zone	Site		FSS	SET 1	SET 2	SET 3	TC	SIC	TOC	V Labile	Labile	Less Labile	Non Labile	TOC Stock	TC Stock	SIC Stock	BD	TC	SIC	TOC	V Labile	Labile	Less Labile	Non Labile	TOC Stock	TC Stock	SIC Stock
Jhum Fallow	JF	Humid Mild Tropical	Dampa	0-15	5.98788	0.6765	0.957	1.3035	1.89655	0.246552	1.65	0.6765	0.2805	0.3465	0.3465	9.88	11.3563	1.47632
Jhum Fallow	JF	Humid Mild Tropical	Dampa	0-15	5.98667	0.675	1.035	1.275	1.76471	0.264706	1.5	0.675	0.36	0.24	0.225	8.98	10.5647	1.58471
Jhum Fallow	JF	Humid Mild Tropical	Dampa	0-15	5.98611	0.6768	0.9792	1.2528	1.56522	0.125217	1.44	0.6768	0.3024	0.2736	0.1872	8.62	9.36957	0.749565	5.98689	1.74216	0.212158	1.53	0.6761	0.3143	0.2867	0.2529	9.16	10.4302	1.2702
Jhum Fallow	JF	Humid Mild Tropical	Dampa	15-30	5.91852	0.5265	0.7155	0.9585	1.51685	0.166854	1.35	0.5265	0.189	0.243	0.3915	7.99	8.97753	0.987528
Jhum Fallow	JF	Humid Mild Tropical	Dampa	15-30	5.91892	0.444	0.6438	0.7659	1.24719	0.137191	1.11	0.444	0.1998	0.1221	0.3441	6.57	7.38202	0.812022
Jhum Fallow	JF	Humid Mild Tropical	Dampa	15-30	5.91304	0.3864	0.552	0.7866	1.46809	0.0880851	1.38	0.3864	0.1656	0.2346	0.5934	8.16	8.68085	0.520851	5.91683	1.41071	0.13071	1.28	0.4523	0.1848	0.1999	0.443	7.57333	8.3468	0.773467
Jhum Fallow	JF	Humid Mild Tropical	Dampa	30-45	5.67857	0.3024	0.5712	0.7308	0.893617	0.053617	0.84	0.3024	0.2688	0.1596	0.1092	4.77	5.07447	0.304468
Jhum Fallow	JF	Humid Mild Tropical	Dampa	30-45	5.67619	0.4725	0.777	1.071	1.15385	0.103846	1.05	0.4725	0.3045	0.294	-0.021	5.96	6.54945	0.589451
Jhum Fallow	JF	Humid Mild Tropical	Dampa	30-45	5.67816	0.3828	0.5655	0.783	1	0.13	0.87	0.3828	0.1827	0.2175	0.087	4.94	5.67816	0.738161	5.67764	1.01582	0.0958211	0.92	0.3859	0.252	0.2237	0.0584	5.22333	5.76736	0.544027	21.9567	24.5444	2.58769
Jhum Fallow	JF	Temperate Sub Alpine	Lungzarthum	0-15	4.02604	1.6512	2.1888	3.1488	4.08511	0.245106	3.84	1.6512	0.5376	0.96	0.6912	15.46	16.4468	0.986809
Jhum Fallow	JF	Temperate Sub Alpine	Lungzarthum	0-15	4.02419	1.7484	2.4924	3.3852	4.13333	0.413333	3.72	1.7484	0.744	0.8928	0.3348	14.97	16.6333	1.66333
Jhum Fallow	JF	Temperate Sub Alpine	Lungzarthum	0-15	4.02521	1.5708	2.0706	2.6775	4.2	0.63	3.57	1.5708	0.4998	0.6069	0.8925	14.37	16.9059	2.53588	4.02515	4.13948	0.42948	3.71	1.6568	0.5938	0.8199	0.6395	14.9333	16.662	1.72867
Jhum Fallow	JF	Temperate Sub Alpine	Lungzarthum	15-30	3.67725	0.7182	0.945	1.3986	2.05435	0.164348	1.89	0.7182	0.2268	0.4536	0.4914	6.95	7.55435	0.604348
Jhum Fallow	JF	Temperate Sub Alpine	Lungzarthum	15-30	3.67376	0.5781	0.8601	1.2408	1.5	0.09	1.41	0.5781	0.282	0.3807	0.1692	5.18	5.51064	0.330638
Jhum Fallow	JF	Temperate Sub Alpine	Lungzarthum	15-30	3.67308	0.4836	0.6708	0.9984	1.77273	0.212727	1.56	0.4836	0.1872	0.3276	0.5616	5.73	6.51136	0.781364	3.67469	1.77569	0.155692	1.62	0.5933	0.232	0.3873	0.4074	5.95333	6.52545	0.572117
Jhum Fallow	JF	Temperate Sub Alpine	Lungzarthum	30-45	3.51449	0.5244	0.8556	1.173	1.60465	0.224651	1.38	0.5244	0.3312	0.3174	0.207	4.85	5.63953	0.789535
Jhum Fallow	JF	Temperate Sub Alpine	Lungzarthum	30-45	3.5122	0.4428	0.8241	1.0701	1.30851	0.0785106	1.23	0.4428	0.3813	0.246	0.1599	4.32	4.59574	0.275745
Jhum Fallow	JF	Temperate Sub Alpine	Lungzarthum	30-45	3.51333	0.63	1.11	1.47	1.57895	0.0789474	1.5	0.63	0.48	0.36	0.03	5.27	5.54737	0.277368	3.51334	1.49737	0.12737	1.37	0.5324	0.3975	0.3078	0.1323	4.81333	5.26088	0.447549	25.7	28.4483	2.74834
Jhum Fallow	JF	Humid Sub Tropical	Sakawrtuichaun	0-15	9.57143	0.4725	0.63	0.777	1.22093	0.17093	1.05	0.4725	0.1575	0.147	0.273	10.05	11.686	1.63605
Jhum Fallow	JF	Humid Sub Tropical	Sakawrtuichaun	0-15	9.57265	0.4914	0.7605	0.9711	1.27174	0.101739	1.17	0.4914	0.2691	0.2106	0.1989	11.2	12.1739	0.973913
Jhum Fallow	JF	Humid Sub Tropical	Sakawrtuichaun	0-15	9.57265	0.5148	0.7371	0.9828	1.28571	0.115714	1.17	0.5148	0.2223	0.2457	0.1872	11.2	12.3077	1.10769	9.57224	1.25946	0.129461	1.13	0.4929	0.2163	0.2011	0.2197	10.8167	12.0559	1.23922
Jhum Fallow	JF	Humid Sub Tropical	Sakawrtuichaun	15-30	9.52083	0.3744	0.5088	0.7296	1.07865	0.118652	0.96	0.3744	0.1344	0.2208	0.2304	9.14	10.2697	1.12966
Jhum Fallow	JF	Humid Sub Tropical	Sakawrtuichaun	15-30	9.52874	0.3654	0.5046	0.6873	0.966667	0.0966667	0.87	0.3654	0.1392	0.1827	0.1827	8.29	9.21111	0.921111
Jhum Fallow	JF	Humid Sub Tropical	Sakawrtuichaun	15-30	9.52381	0.3192	0.462	0.5796	0.884211	0.0442105	0.84	0.3192	0.1428	0.1176	0.2604	8	8.42105	0.421053	9.52446	0.97651	0.0865096	0.89	0.353	0.1388	0.1737	0.2245	8.47667	9.30061	0.823942
Jhum Fallow	JF	Humid Sub Tropical	Sakawrtuichaun	30-45	9.44444	0.0684	0.126	0.171	0.197802	0.0178022	0.18	0.0684	0.0576	0.045	0.009	1.7	1.86813	0.168132
Jhum Fallow	JF	Humid Sub Tropical	Sakawrtuichaun	30-45	9.46667	0.0645	0.1035	0.144	0.157895	0.00789474	0.15	0.0645	0.039	0.0405	0.006	1.42	1.49474	0.0747368
Jhum Fallow	JF	Humid Sub Tropical	Sakawrtuichaun	30-45	9.45833	0.1056	0.1632	0.216	0.27907	0.0390698	0.24	0.1056	0.0576	0.0528	0.024	2.27	2.63953	0.369535	9.45648	0.211589	0.0215889	0.19	0.0795	0.0514	0.0461	0.013	1.79667	2.0008	0.204135	21.09	23.3573	2.26729

## Sheet: Plantation
						12 N H2SO4	18 N H2SO4	24 N H2SO4	CHN Analyzer	Dilute HCL
Major LU	LU Type	AE Zone	Site		FSS	SET 1	SET 2	SET 3	TC	SIC	TOC	V Labile	Labile	Less Labile	Non Labile	TOC Stock	TC Stock	SIC Stock	BD	TC	SIC	TOC	V Labile	Labile	Less Labile	Non Labile	TOC Stock	TC Stock	SIC Stock
Plantation	Teak	Humid Mild Tropical	Bairabi	0-15	12.0516	1.134	1.7136	2.1924	2.68085	0.160851	2.52	1.134	0.5796	0.4788	0.3276	30.37	32.3085	1.93851
Plantation	Teak	Humid Mild Tropical	Bairabi	0-15	12.0357	1.0836	1.6128	2.0916	2.70968	0.189677	2.52	1.0836	0.5292	0.4788	0.4284	30.33	32.6129	2.2829
Plantation	Teak	Humid Mild Tropical	Bairabi	0-15	12.0376	0.8733	1.1928	1.5336	2.24211	0.112105	2.13	0.8733	0.3195	0.3408	0.5964	25.64	26.9895	1.34947	12.0416	2.54421	0.154211	2.39	1.0303	0.4761	0.4328	0.4508	28.78	30.637	1.85696
Plantation	Teak	Humid Mild Tropical	Bairabi	15-30	12.6772	0.7371	1.0206	1.5876	1.98947	0.0994737	1.89	0.7371	0.2835	0.567	0.3024	23.96	25.2211	1.26105
Plantation	Teak	Humid Mild Tropical	Bairabi	15-30	12.6772	0.5481	0.8127	1.3986	2.1	0.21	1.89	0.5481	0.2646	0.5859	0.4914	23.96	26.6222	2.66222
Plantation	Teak	Humid Mild Tropical	Bairabi	15-30	12.6772	0.7938	1.134	1.5876	2.14773	0.257727	1.89	0.7938	0.3402	0.4536	0.3024	23.96	27.2273	3.26727	12.6772	2.07907	0.189067	1.89	0.693	0.2961	0.5355	0.3654	23.96	26.3568	2.39685
Plantation	Teak	Humid Mild Tropical	Bairabi	30-45	12.9216	0.3876	0.6732	0.9078	1.13333	0.113333	1.02	0.3876	0.2856	0.2346	0.1122	13.18	14.6444	1.46444
Plantation	Teak	Humid Mild Tropical	Bairabi	30-45	12.9247	0.372	0.5394	0.8184	1.0814	0.151395	0.93	0.372	0.1674	0.279	0.1116	12.02	13.9767	1.95674
Plantation	Teak	Humid Mild Tropical	Bairabi	30-45	12.9271	0.336	0.5184	0.7392	1.01053	0.0505263	0.96	0.336	0.1824	0.2208	0.2208	12.41	13.0632	0.653158	12.9245	1.07508	0.105085	0.97	0.3652	0.2118	0.2448	0.1482	12.5367	13.8948	1.35812	65.2767	70.8886	5.61193
Plantation	Coffee	Humid Sub Tropical	Bualpui	0-15	7.42723	0.8733	1.3206	1.704	2.47674	0.346744	2.13	0.8733	0.4473	0.3834	0.426	15.82	18.3953	2.57535
Plantation	Coffee	Humid Sub Tropical	Bualpui	0-15	7.42786	0.8241	1.1256	1.4271	2.25843	0.248427	2.01	0.8241	0.3015	0.3015	0.5829	14.93	16.7753	1.84528
Plantation	Coffee	Humid Sub Tropical	Bualpui	0-15	7.42857	0.8694	1.2852	1.5687	2.07692	0.186923	1.89	0.8694	0.4158	0.2835	0.3213	14.04	15.4286	1.38857	7.42789	2.2707	0.260698	2.01	0.8556	0.3882	0.3228	0.4434	14.93	16.8664	1.9364
Plantation	Coffee	Humid Sub Tropical	Bualpui	15-30	7.66667	0.4704	0.7644	1.1907	1.72941	0.259412	1.47	0.4704	0.294	0.4263	0.2793	11.27	13.2588	1.98882
Plantation	Coffee	Humid Sub Tropical	Bualpui	15-30	7.66667	0.4224	0.6864	0.8184	1.5	0.18	1.32	0.4224	0.264	0.132	0.5016	10.12	11.5	1.38
Plantation	Coffee	Humid Sub Tropical	Bualpui	15-30	7.66667	0.6	0.795	1.245	1.64835	0.148352	1.5	0.6	0.195	0.45	0.255	11.5	12.6374	1.13736	7.66667	1.62592	0.195921	1.43	0.4976	0.251	0.3361	0.3453	10.9633	12.4654	1.50206
Plantation	Coffee	Humid Sub Tropical	Bualpui	30-45	7.71569	0.3672	0.663	0.9078	1.1087	0.0886957	1.02	0.3672	0.2958	0.2448	0.1122	7.87	8.55435	0.684348
Plantation	Coffee	Humid Sub Tropical	Bualpui	30-45	7.71717	0.3663	0.5247	0.7227	1.07609	0.086087	0.99	0.3663	0.1584	0.198	0.2673	7.64	8.30435	0.664348
Plantation	Coffee	Humid Sub Tropical	Bualpui	30-45	7.72222	0.315	0.522	0.792	0.957447	0.0574468	0.9	0.315	0.207	0.27	0.108	6.95	7.39362	0.443617	7.71836	1.04741	0.0774098	0.97	0.3495	0.2204	0.2376	0.1625	7.48667	8.0841	0.597438	33.38	37.4159	4.0359
Plantation	Orange	Humid Sub Tropical	Bualpui	0-15	10.7067	0.705	1.02	1.365	1.63043	0.130435	1.5	0.705	0.315	0.345	0.135	16.06	17.4565	1.39652
Plantation	Orange	Humid Sub Tropical	Bualpui	0-15	10.7083	0.8856	1.2528	1.5552	2.27368	0.113684	2.16	0.8856	0.3672	0.3024	0.6048	23.13	24.3474	1.21737
Plantation	Orange	Humid Sub Tropical	Bualpui	0-15	10.7091	0.693	1.0395	1.3695	1.85393	0.203933	1.65	0.693	0.3465	0.33	0.2805	17.67	19.8539	2.18393	10.708	1.91935	0.149351	1.77	0.7612	0.3429	0.3258	0.3401	18.9533	20.5526	1.59927
Plantation	Orange	Humid Sub Tropical	Bualpui	15-30	11.6889	0.4455	0.675	0.8775	1.48352	0.133516	1.35	0.4455	0.2295	0.2025	0.4725	15.78	17.3407	1.56066
Plantation	Orange	Humid Sub Tropical	Bualpui	15-30	11.6918	0.5247	0.7473	1.2243	1.67368	0.0836842	1.59	0.5247	0.2226	0.477	0.3657	18.59	19.5684	0.978421
Plantation	Orange	Humid Sub Tropical	Bualpui	15-30	11.6918	0.6201	0.9063	1.2402	1.82759	0.237586	1.59	0.6201	0.2862	0.3339	0.3498	18.59	21.3678	2.77782	11.6908	1.6616	0.151596	1.51	0.5301	0.2461	0.3378	0.396	17.6533	19.4256	1.7723	44.0933	48.0623	3.96901
Plantation	Orange	Humid Sub Tropical	Bualpui	30-45	11.8642	0.2835	0.405	0.6237	0.9	0.09	0.81	0.2835	0.1215	0.2187	0.1863	9.61	10.6778	1.06778
Plantation	Orange	Humid Sub Tropical	Bualpui	30-45	11.8687	0.4455	0.6633	0.9207	1.1	0.11	0.99	0.4455	0.2178	0.2574	0.0693	11.75	13.0556	1.30556
Plantation	Orange	Humid Sub Tropical	Bualpui	30-45	11.8667	0.5805	0.864	1.215	1.46739	0.117391	1.35	0.5805	0.2835	0.351	0.135	16.02	17.413	1.39304	11.8665	1.1558	0.105797	1.05	0.4365	0.2076	0.2757	0.1302	12.46	13.7155	1.25546
Plantation	BF	Temperate Sub Alpine	Champhai	0-15	9.53901	0.6204	0.9729	1.2972	1.51613	0.106129	1.41	0.6204	0.3525	0.3243	0.1128	13.45	14.4624	1.01237
Plantation	BF	Temperate Sub Alpine	Champhai	0-15	9.53901	0.5922	0.9306	1.2831	1.54945	0.139451	1.41	0.5922	0.3384	0.3525	0.1269	13.45	14.7802	1.33022
Plantation	BF	Temperate Sub Alpine	Champhai	0-15	9.54348	0.6348	0.9384	1.2834	1.45263	0.0726316	1.38	0.6348	0.3036	0.345	0.0966	13.17	13.8632	0.693158	9.5405	1.50607	0.10607	1.4	0.6158	0.3315	0.3406	0.1121	13.3567	14.3686	1.01191
Plantation	BF	Temperate Sub Alpine	Champhai	15-30	9.29915	0.4212	0.6201	0.9243	1.28571	0.115714	1.17	0.4212	0.1989	0.3042	0.2457	10.88	11.956	1.07604
Plantation	BF	Temperate Sub Alpine	Champhai	15-30	9.30159	0.4536	0.7056	1.071	1.43182	0.171818	1.26	0.4536	0.252	0.3654	0.189	11.72	13.3182	1.59818
Plantation	BF	Temperate Sub Alpine	Champhai	15-30	9.3	0.42	0.648	0.804	1.29032	0.0903226	1.2	0.42	0.228	0.156	0.396	11.16	12	0.84	9.30024	1.33595	0.125952	1.21	0.4316	0.2263	0.2752	0.2769	11.2533	12.4247	1.17141
Plantation	BF	Temperate Sub Alpine	Champhai	30-45	9.31373	0.459	0.7854	1.02	1.12088	0.100879	1.02	0.459	0.3264	0.2346	0	9.5	10.4396	0.93956
Plantation	BF	Temperate Sub Alpine	Champhai	30-45	9.31373	0.459	0.7242	1.0098	1.13333	0.113333	1.02	0.459	0.2652	0.2856	0.0102	9.5	10.5556	1.05556
Plantation	BF	Temperate Sub Alpine	Champhai	30-45	9.31313	0.3465	0.5643	0.7425	1.06452	0.0745161	0.99	0.3465	0.2178	0.1782	0.2475	9.22	9.91398	0.693978	9.31353	1.10624	0.0962429	1.01	0.4215	0.2698	0.2328	0.0859	9.40667	10.303	0.896365	34.0167	37.0964	3.07969
Plantation	Pine	Temperate Sub Alpine	Farpak	0-15	3.86087	1.587	2.1045	2.9325	3.63158	0.181579	3.45	1.587	0.5175	0.828	0.5175	13.32	14.0211	0.701053
Plantation	Pine	Temperate Sub Alpine	Farpak	0-15	3.86012	1.4784	1.9152	2.5872	3.90698	0.546977	3.36	1.4784	0.4368	0.672	0.7728	12.97	15.0814	2.1114
Plantation	Pine	Temperate Sub Alpine	Farpak	0-15	3.86136	1.4916	2.2035	2.9832	3.98824	0.598235	3.39	1.4916	0.7119	0.7797	0.4068	13.09	15.4	2.31	3.86078	3.84226	0.442264	3.4	1.519	0.5554	0.7599	0.5657	13.1267	14.8341	1.70748
Plantation	Pine	Temperate Sub Alpine	Farpak	15-30	3.85075	0.5829	0.8643	1.3065	2.16129	0.15129	2.01	0.5829	0.2814	0.4422	0.7035	7.74	8.32258	0.582581
Plantation	Pine	Temperate Sub Alpine	Farpak	15-30	3.85311	0.5487	0.9204	1.2036	1.98876	0.218764	1.77	0.5487	0.3717	0.2832	0.5664	6.82	7.66292	0.842921
Plantation	Pine	Temperate Sub Alpine	Farpak	15-30	3.85024	0.621	0.9315	1.3869	2.17895	0.108947	2.07	0.621	0.3105	0.4554	0.6831	7.97	8.38947	0.419474	3.85137	2.10967	0.159667	1.95	0.5842	0.3212	0.3936	0.651	7.51	8.12499	0.614992
Plantation	Pine	Temperate Sub Alpine	Farpak	30-45	3.83673	0.6615	1.0143	1.3965	1.63333	0.163333	1.47	0.6615	0.3528	0.3822	0.0735	5.64	6.26667	0.626667
Plantation	Pine	Temperate Sub Alpine	Farpak	30-45	3.83761	0.4095	0.5967	0.8073	1.31461	0.144607	1.17	0.4095	0.1872	0.2106	0.3627	4.49	5.04494	0.554944
Plantation	Pine	Temperate Sub Alpine	Farpak	30-45	3.83648	0.636	0.9699	1.3992	1.72826	0.138261	1.59	0.636	0.3339	0.4293	0.1908	6.1	6.63043	0.530435	3.83694	1.55873	0.148734	1.41	0.569	0.2913	0.3407	0.209	5.41	5.98068	0.570682	26.0467	28.9398	2.89316
Plantation	Mango	Humid Mild Tropical	Kawlchaw	0-15	7.87387	0.5106	0.666	0.8547	1.2907	0.180698	1.11	0.5106	0.1554	0.1887	0.2553	8.74	10.1628	1.42279
Plantation	Mango	Humid Mild Tropical	Kawlchaw	0-15	7.87097	0.4185	0.5394	0.6882	1.02198	0.091978	0.93	0.4185	0.1209	0.1488	0.2418	7.32	8.04396	0.723956
Plantation	Mango	Humid Mild Tropical	Kawlchaw	0-15	7.875	0.54	0.84	1.068	1.37931	0.17931	1.2	0.54	0.3	0.228	0.132	9.45	10.8621	1.41207	7.87328	1.23066	0.150662	1.08	0.4897	0.1921	0.1885	0.2097	8.50333	9.68961	1.18627
Plantation	Mango	Humid Mild Tropical	Kawlchaw	15-30	8.13333	0.054	0.072	0.0915	0.172414	0.0224138	0.15	0.054	0.018	0.0195	0.0585	1.22	1.4023	0.182299
Plantation	Mango	Humid Mild Tropical	Kawlchaw	15-30	8.15385	0.2496	0.351	0.4914	0.886364	0.106364	0.78	0.2496	0.1014	0.1404	0.2886	6.36	7.22727	0.867273
Plantation	Mango	Humid Mild Tropical	Kawlchaw	15-30	8.15152	0.231	0.3102	0.4488	0.75	0.09	0.66	0.231	0.0792	0.1386	0.2112	5.38	6.11364	0.733636	8.14623	0.602926	0.0729258	0.53	0.1782	0.0662	0.0995	0.1861	4.32	4.9144	0.594403
Plantation	Mango	Humid Mild Tropical	Kawlchaw	30-45	8.35417	0.1872	0.2976	0.4128	0.539326	0.0593258	0.48	0.1872	0.1104	0.1152	0.0672	4.01	4.50562	0.495618
Plantation	Mango	Humid Mild Tropical	Kawlchaw	30-45	8.35897	0.1677	0.2652	0.351	0.438202	0.0482022	0.39	0.1677	0.0975	0.0858	0.039	3.26	3.66292	0.402921
Plantation	Mango	Humid Mild Tropical	Kawlchaw	30-45	8.37037	0.0945	0.1566	0.2052	0.290323	0.0203226	0.27	0.0945	0.0621	0.0486	0.0648	2.26	2.43011	0.170108	8.36117	0.422617	0.0426169	0.38	0.1498	0.09	0.0832	0.057	3.17667	3.53288	0.356216	16	18.1369	2.13689
Plantation	Arecanut	Humid Mild Tropical	Sairang	0-15	6.11321	0.7314	1.0494	1.3197	1.70968	0.119677	1.59	0.7314	0.318	0.2703	0.2703	9.72	10.4516	0.731613
Plantation	Arecanut	Humid Mild Tropical	Sairang	0-15	6.11111	0.945	1.26	1.8	2.41935	0.169355	2.25	0.945	0.315	0.54	0.45	13.75	14.7849	1.03495
Plantation	Arecanut	Humid Mild Tropical	Sairang	0-15	6.11111	0.81	1.224	1.656	1.95652	0.156522	1.8	0.81	0.414	0.432	0.144	11	11.9565	0.956522	6.11181	2.02852	0.148518	1.88	0.8288	0.349	0.4141	0.2881	11.49	12.3977	0.907694
Plantation	Arecanut	Humid Mild Tropical	Sairang	15-30	5.86667	0.693	1.008	1.575	2.35955	0.259551	2.1	0.693	0.315	0.567	0.525	12.32	13.8427	1.5227
Plantation	Arecanut	Humid Mild Tropical	Sairang	15-30	5.86667	0.6105	0.8415	1.3035	1.83333	0.183333	1.65	0.6105	0.231	0.462	0.3465	9.68	10.7556	1.07556
Plantation	Arecanut	Humid Mild Tropical	Sairang	15-30	5.8631	0.5208	0.84	1.0752	1.82609	0.146087	1.68	0.5208	0.3192	0.2352	0.6048	9.85	10.7065	0.856522	5.86548	2.00632	0.196324	1.81	0.6081	0.2884	0.4214	0.4921	10.6167	11.7683	1.15159
Plantation	Arecanut	Humid Mild Tropical	Sairang	30-45	5.80159	0.567	0.9072	1.134	1.41573	0.15573	1.26	0.567	0.3402	0.2268	0.126	7.31	8.21348	0.903483
Plantation	Arecanut	Humid Mild Tropical	Sairang	30-45	5.80159	0.4914	0.7434	1.071	1.34043	0.0804255	1.26	0.4914	0.252	0.3276	0.189	7.31	7.7766	0.466596
Plantation	Arecanut	Humid Mild Tropical	Sairang	30-45	5.80556	0.4644	0.6912	0.9396	1.21348	0.133483	1.08	0.4644	0.2268	0.2484	0.1404	6.27	7.04494	0.774944	5.80291	1.32321	0.123213	1.2	0.5076	0.273	0.2676	0.1518	6.96333	7.67834	0.715008	29.07	31.8443	2.77429
Plantation	Arecanut	Humid Sub Tropical	Thingdawl	0-15	10.7033	1.0332	1.476	2.091	2.82759	0.367586	2.46	1.0332	0.4428	0.615	0.369	26.33	30.2644	3.93437
Plantation	Arecanut	Humid Sub Tropical	Thingdawl	0-15	10.7018	1.0488	1.4136	1.938	2.65116	0.371163	2.28	1.0488	0.3648	0.5244	0.342	24.4	28.3721	3.97209
Plantation	Arecanut	Humid Sub Tropical	Thingdawl	0-15	10.7027	0.9102	1.3764	1.8426	2.52273	0.302727	2.22	0.9102	0.4662	0.4662	0.3774	23.76	27	3.24	10.7026	2.66716	0.347159	2.32	0.9974	0.4246	0.5352	0.3628	24.83	28.5455	3.71549
Plantation	Arecanut	Humid Sub Tropical	Thingdawl	15-30	11.4677	0.5766	0.8928	1.4694	2.18824	0.328235	1.86	0.5766	0.3162	0.5766	0.3906	21.33	25.0941	3.76412
Plantation	Arecanut	Humid Sub Tropical	Thingdawl	15-30	11.4641	0.5967	0.8568	1.0863	1.66304	0.133043	1.53	0.5967	0.2601	0.2295	0.4437	17.54	19.0652	1.52522
Plantation	Arecanut	Humid Sub Tropical	Thingdawl	15-30	11.4634	0.4797	0.6396	0.8241	1.33696	0.106957	1.23	0.4797	0.1599	0.1845	0.4059	14.1	15.3261	1.22609	11.4651	1.72941	0.189412	1.54	0.551	0.2454	0.3302	0.4134	17.6567	19.8285	2.17181
Plantation	Arecanut	Humid Sub Tropical	Thingdawl	30-45	11.6525	0.5076	0.9306	1.2408	1.60227	0.192273	1.41	0.5076	0.423	0.3102	0.1692	16.43	18.6705	2.24045
Plantation	Arecanut	Humid Sub Tropical	Thingdawl	30-45	11.6525	0.5781	0.9306	1.1844	1.56667	0.156667	1.41	0.5781	0.3525	0.2538	0.2256	16.43	18.2556	1.82556
Plantation	Arecanut	Humid Sub Tropical	Thingdawl	30-45	11.6548	0.6888	1.1088	1.5624	1.93103	0.251034	1.68	0.6888	0.42	0.4536	0.1176	19.58	22.5057	2.92575	11.6532	1.69999	0.199991	1.5	0.5915	0.3985	0.3392	0.1708	17.48	19.8106	2.33059	59.9667	68.1845	8.21788
Plantation	BF	Humid Mild Tropical	Lengpui	0-15	8.66667	0.6348	0.8556	1.0764	1.58621	0.206207	1.38	0.6348	0.2208	0.2208	0.3036	11.96	13.7471	1.78713
Plantation	BF	Humid Mild Tropical	Lengpui	0-15	8.66667	0.6075	0.918	1.161	1.48352	0.133516	1.35	0.6075	0.3105	0.243	0.189	11.7	12.8571	1.15714
Plantation	BF	Humid Mild Tropical	Lengpui	0-15	8.66667	0.5544	0.8568	1.1466	1.44828	0.188276	1.26	0.5544	0.3024	0.2898	0.1134	10.92	12.5517	1.63172	8.66667	1.506	0.176	1.33	0.5989	0.2779	0.2512	0.202	11.5267	13.052	1.52533
Plantation	BF	Humid Mild Tropical	Lengpui	15-30	8.57658	0.444	0.6549	0.8658	1.21978	0.10978	1.11	0.444	0.2109	0.2109	0.2442	9.52	10.4615	0.941538
Plantation	BF	Humid Mild Tropical	Lengpui	15-30	8.57407	0.4536	0.594	0.918	1.24138	0.161379	1.08	0.4536	0.1404	0.324	0.162	9.26	10.6437	1.38368
Plantation	BF	Humid Mild Tropical	Lengpui	15-30	8.57724	0.4428	0.6396	0.8487	1.39773	0.167727	1.23	0.4428	0.1968	0.2091	0.3813	10.55	11.9886	1.43864	8.57596	1.2863	0.146296	1.14	0.4468	0.1827	0.248	0.2625	9.77667	11.0313	1.25462	38.7833	43.8939	5.11053
Plantation	BF	Humid Mild Tropical	Lengpui	30-45	8.45556	0.36	0.576	0.846	1.04651	0.146512	0.9	0.36	0.216	0.27	0.054	7.61	8.84884	1.23884
Plantation	BF	Humid Mild Tropical	Lengpui	30-45	8.45556	0.342	0.612	0.801	1.03448	0.134483	0.9	0.342	0.27	0.189	0.099	7.61	8.74713	1.13713
Plantation	BF	Humid Mild Tropical	Lengpui	30-45	8.44792	0.3552	0.5088	0.72	1.11628	0.156279	0.96	0.3552	0.1536	0.2112	0.24	8.11	9.43023	1.32023	8.45301	1.06576	0.145758	0.92	0.3524	0.2132	0.2234	0.131	7.77667	9.00873	1.23207
Plantation	BF	Humid Sub Tropical	Tanhril	0-15	9.58559	0.4773	0.6549	0.8103	1.18085	0.0708511	1.11	0.4773	0.1776	0.1554	0.2997	10.64	11.3191	0.679149
Plantation	BF	Humid Sub Tropical	Tanhril	0-15	9.58559	0.5217	0.7548	0.999	1.27586	0.165862	1.11	0.5217	0.2331	0.2442	0.111	10.64	12.2299	1.58989
Plantation	BF	Humid Sub Tropical	Tanhril	0-15	9.58333	0.486	0.648	0.8532	1.17391	0.093913	1.08	0.486	0.162	0.2052	0.2268	10.35	11.25	0.9	9.58483	1.21021	0.110209	1.1	0.495	0.1909	0.2016	0.2125	10.5433	11.5997	1.05634
Plantation	BF	Humid Sub Tropical	Tanhril	15-30	9.14706	0.357	0.4794	0.6528	1.14607	0.126067	1.02	0.357	0.1224	0.1734	0.3672	9.33	10.4831	1.15315
Plantation	BF	Humid Sub Tropical	Tanhril	15-30	9.14444	0.378	0.531	0.765	1.02273	0.122727	0.9	0.378	0.153	0.234	0.135	8.23	9.35227	1.12227
Plantation	BF	Humid Sub Tropical	Tanhril	15-30	9.15054	0.2976	0.4092	0.6045	1.05682	0.126818	0.93	0.2976	0.1116	0.1953	0.3255	8.51	9.67045	1.16045	9.14735	1.0752	0.125204	0.95	0.3442	0.129	0.2009	0.2759	8.69	9.83529	1.14529
Plantation	BF	Humid Sub Tropical	Tanhril	30-45	9.28986	0.276	0.4278	0.5865	0.734043	0.0440426	0.69	0.276	0.1518	0.1587	0.1035	6.41	6.81915	0.409149
Plantation	BF	Humid Sub Tropical	Tanhril	30-45	9.28986	0.2622	0.4761	0.6072	0.75	0.06	0.69	0.2622	0.2139	0.1311	0.0828	6.41	6.96739	0.557391
Plantation	BF	Humid Sub Tropical	Tanhril	30-45	9.29032	0.3627	0.5487	0.7998	0.989362	0.0593617	0.93	0.3627	0.186	0.2511	0.1302	8.64	9.19149	0.551489	9.29001	0.824468	0.0544681	0.77	0.3003	0.1839	0.1803	0.1055	7.15333	7.65934	0.50601	26.3867	29.0943	2.70765
Plantation	Oil_palm	Humid Mild Tropical	Lengpui	0-15	8.14634	0.5166	0.8118	1.0455	1.41379	0.183793	1.23	0.5166	0.2952	0.2337	0.1845	10.02	11.5172	1.49724
Plantation	Oil_palm	Humid Mild Tropical	Lengpui	0-15	8.14286	0.5292	0.7056	0.9702	1.38462	0.124615	1.26	0.5292	0.1764	0.2646	0.2898	10.26	11.2747	1.01473
Plantation	Oil_palm	Humid Mild Tropical	Lengpui	0-15	8.14286	0.5544	0.756	1.0332	1.43182	0.171818	1.26	0.5544	0.2016	0.2772	0.2268	10.26	11.6591	1.39909	8.14402	1.41008	0.160076	1.25	0.5334	0.2244	0.2585	0.2337	10.18	11.4837	1.30369
Plantation	Oil_palm	Humid Mild Tropical	Lengpui	15-30	7.92381	0.357	0.504	0.672	1.16667	0.116667	1.05	0.357	0.147	0.168	0.378	8.32	9.24444	0.924444
Plantation	Oil_palm	Humid Mild Tropical	Lengpui	15-30	7.92982	0.3306	0.5586	0.7752	1.2809	0.140899	1.14	0.3306	0.228	0.2166	0.3648	9.04	10.1573	1.1173
Plantation	Oil_palm	Humid Mild Tropical	Lengpui	15-30	7.92308	0.468	0.6669	0.8424	1.3	0.13	1.17	0.468	0.1989	0.1755	0.3276	9.27	10.3	1.03	7.92557	1.24919	0.129189	1.12	0.3852	0.1913	0.1867	0.3568	8.87667	9.90058	1.02392
Plantation	Oil_palm	Humid Mild Tropical	Lengpui	30-45	7.8	0.246	0.396	0.552	0.659341	0.0593407	0.6	0.246	0.15	0.156	0.048	4.68	5.14286	0.462857
Plantation	Oil_palm	Humid Mild Tropical	Lengpui	30-45	7.79487	0.1482	0.2067	0.3198	0.410526	0.0205263	0.39	0.1482	0.0585	0.1131	0.0702	3.04	3.2	0.16
Plantation	Oil_palm	Humid Mild Tropical	Lengpui	30-45	7.80208	0.3648	0.6048	0.816	1.10345	0.143448	0.96	0.3648	0.24	0.2112	0.144	7.49	8.6092	1.1192	7.79899	0.724438	0.0744384	0.65	0.253	0.1495	0.1601	0.0874	5.07	5.65068	0.580684	24.1267	27.035	2.90829
Plantation	Oil_palm	Humid Sub Tropical	Thingdawl	0-15	9.79798	1.2771	1.8711	2.5245	3.45349	0.483488	2.97	1.2771	0.594	0.6534	0.4455	29.1	33.8372	4.73721
Plantation	Oil_palm	Humid Sub Tropical	Thingdawl	0-15	9.79825	0.9576	1.3452	1.9152	2.5618	0.281798	2.28	0.9576	0.3876	0.57	0.3648	22.34	25.1011	2.76112
Plantation	Oil_palm	Humid Sub Tropical	Thingdawl	0-15	9.7973	0.9546	1.443	1.9758	2.41304	0.193043	2.22	0.9546	0.4884	0.5328	0.2442	21.75	23.6413	1.8913	9.79784	2.80944	0.319443	2.49	1.0631	0.49	0.5854	0.3515	24.3967	27.5265	3.12988
Plantation	Oil_palm	Humid Sub Tropical	Thingdawl	15-30	8.8547	0.4563	0.6903	0.8658	1.24468	0.0746809	1.17	0.4563	0.234	0.1755	0.3042	10.36	11.0213	0.661277
Plantation	Oil_palm	Humid Sub Tropical	Thingdawl	15-30	8.85185	0.513	0.7155	1.1205	1.45161	0.101613	1.35	0.513	0.2025	0.405	0.2295	11.95	12.8495	0.899462
Plantation	Oil_palm	Humid Sub Tropical	Thingdawl	15-30	8.85294	0.3468	0.4998	0.7548	1.2	0.18	1.02	0.3468	0.153	0.255	0.2652	9.03	10.6235	1.59353	8.85316	1.29876	0.118765	1.18	0.4387	0.1965	0.2785	0.2663	10.4467	11.4981	1.05142	39.9133	44.6753	4.76199
Plantation	Oil_palm	Humid Sub Tropical	Thingdawl	30-45	11.4	0.594	0.945	1.242	1.46739	0.117391	1.35	0.594	0.351	0.297	0.108	15.39	16.7283	1.33826
Plantation	Oil_palm	Humid Sub Tropical	Thingdawl	30-45	11.4017	0.468	0.6786	0.9828	1.23158	0.0615789	1.17	0.468	0.2106	0.3042	0.1872	13.34	14.0421	0.702105
Plantation	Oil_palm	Humid Sub Tropical	Thingdawl	30-45	11.4031	0.4515	0.8127	1.1481	1.41758	0.127582	1.29	0.4515	0.3612	0.3354	0.1419	14.71	16.1648	1.45484	11.4016	1.37218	0.102184	1.27	0.5045	0.3076	0.3122	0.1457	14.48	15.6451	1.16507
Plantation	Orange	Humid Sub Tropical	Reiek	0-15	8.22989	0.7656	0.9918	1.305	1.83158	0.0915789	1.74	0.7656	0.2262	0.3132	0.435	14.32	15.0737	0.753684
Plantation	Orange	Humid Sub Tropical	Reiek	0-15	8.23392	0.7524	1.0431	1.3338	1.8587	0.148696	1.71	0.7524	0.2907	0.2907	0.3762	14.08	15.3043	1.22435
Plantation	Orange	Humid Sub Tropical	Reiek	0-15	8.23333	0.846	1.26	1.566	1.95652	0.156522	1.8	0.846	0.414	0.306	0.234	14.82	16.1087	1.2887	8.23238	1.88227	0.132265	1.75	0.788	0.3103	0.3033	0.3484	14.4067	15.4956	1.08891
Plantation	Orange	Humid Sub Tropical	Reiek	15-30	8.13158	0.4332	0.5928	0.9006	1.21277	0.072766	1.14	0.4332	0.1596	0.3078	0.2394	9.27	9.8617	0.591702
Plantation	Orange	Humid Sub Tropical	Reiek	15-30	8.13725	0.3672	0.5814	0.8262	1.1087	0.0886957	1.02	0.3672	0.2142	0.2448	0.1938	8.3	9.02174	0.721739
Plantation	Orange	Humid Sub Tropical	Reiek	15-30	8.13889	0.4104	0.6156	0.864	1.18681	0.106813	1.08	0.4104	0.2052	0.2484	0.216	8.79	9.65934	0.869341	8.13591	1.16942	0.0894249	1.08	0.4036	0.193	0.267	0.2164	8.78667	9.51426	0.727594
Plantation	Orange	Humid Sub Tropical	Reiek	30-45	7.98667	0.3375	0.5625	0.7275	0.789474	0.0394737	0.75	0.3375	0.225	0.165	0.0225	5.99	6.30526	0.315263
Plantation	Orange	Humid Sub Tropical	Reiek	30-45	7.98765	0.3078	0.5022	0.648	0.870968	0.0609677	0.81	0.3078	0.1944	0.1458	0.162	6.47	6.95699	0.486989
Plantation	Orange	Humid Sub Tropical	Reiek	30-45	7.98958	0.3552	0.5952	0.8544	1.11628	0.156279	0.96	0.3552	0.24	0.2592	0.1056	7.67	8.9186	1.2486	7.98797	0.925573	0.0855735	0.84	0.3335	0.2198	0.19	0.0967	6.71	7.39362	0.683619	29.9033	32.4035	2.50012
Plantation	Teak	Humid Mild Tropical	Saiha	0-15	6.75897	0.897	1.2675	1.599	2.16667	0.216667	1.95	0.897	0.3705	0.3315	0.351	13.18	14.6444	1.46444
Plantation	Teak	Humid Mild Tropical	Saiha	0-15	6.76101	0.6519	0.9222	1.3197	1.78652	0.196517	1.59	0.6519	0.2703	0.3975	0.2703	10.75	12.0787	1.32865
Plantation	Teak	Humid Mild Tropical	Saiha	0-15	6.75897	0.9165	1.3845	1.755	2.07447	0.124468	1.95	0.9165	0.468	0.3705	0.195	13.18	14.0213	0.841277	6.75965	2.00922	0.179217	1.83	0.8218	0.3696	0.3665	0.2721	12.37	13.5815	1.21146
Plantation	Teak	Humid Mild Tropical	Saiha	15-30	6.68519	0.3132	0.5184	0.7236	1.16129	0.0812903	1.08	0.3132	0.2052	0.2052	0.3564	7.22	7.76344	0.543441
Plantation	Teak	Humid Mild Tropical	Saiha	15-30	6.67816	0.261	0.4089	0.6786	1.02353	0.153529	0.87	0.261	0.1479	0.2697	0.1914	5.81	6.83529	1.02529
Plantation	Teak	Humid Mild Tropical	Saiha	15-30	6.67901	0.2268	0.3483	0.4698	0.880435	0.0704348	0.81	0.2268	0.1215	0.1215	0.3402	5.41	5.88043	0.470435	6.68079	1.02175	0.101752	0.92	0.267	0.1582	0.1988	0.296	6.14667	6.82639	0.679723
Plantation	Teak	Humid Mild Tropical	Saiha	30-45	6.65556	0.369	0.657	0.882	1.01124	0.111236	0.9	0.369	0.288	0.225	0.018	5.99	6.73034	0.740337
Plantation	Teak	Humid Mild Tropical	Saiha	30-45	6.65517	0.3306	0.4872	0.7134	1.02353	0.153529	0.87	0.3306	0.1566	0.2262	0.1566	5.79	6.81176	1.02176
Plantation	Teak	Humid Mild Tropical	Saiha	30-45	6.65278	0.3024	0.4392	0.5832	0.757895	0.0378947	0.72	0.3024	0.1368	0.144	0.1368	4.79	5.04211	0.252105	6.6545	0.930887	0.100887	0.83	0.334	0.1938	0.1984	0.1038	5.52333	6.19474	0.671402	24.04	26.6026	2.56258

## Sheet: Wet Rice Cultivation
						12 N H2SO4	18 N H2SO4	24 N H2SO4	CHN Analyzer	Dilute HCL
Major LU	LU Type	AE Zone	Site		FSS	SET 1	SET 2	SET 3	TC	SIC	TOC	V Labile	Labile	Less Labile	Non Labile	TOC Stock	TC Stock	SIC Stock	BD	TC	SIC	TOC	V Labile	Labile	Less Labile	Non Labile	TOC Stock	TC Stock	SIC Stock
Wet Rice Cultivation	WRC	Humid Mild Tropical	Bairabi	0-15	8.17829	1.1868	1.548	1.9608	2.86667	0.286667	2.58	1.1868	0.3612	0.4128	0.6192	21.1	23.4444	2.34444
Wet Rice Cultivation	WRC	Humid Mild Tropical	Bairabi	0-15	8.17829	1.0836	1.5996	1.9866	2.77419	0.194194	2.58	1.0836	0.516	0.387	0.5934	21.1	22.6882	1.58817
Wet Rice Cultivation	WRC	Humid Mild Tropical	Bairabi	0-15	8.17949	1.4352	2.2152	2.964	3.62791	0.507907	3.12	1.4352	0.78	0.7488	0.156	25.52	29.6744	4.15442	8.17869	3.08959	0.329589	2.76	1.2352	0.5524	0.5162	0.4562	22.5733	25.269	2.69568
Wet Rice Cultivation	WRC	Humid Mild Tropical	Bairabi	15-30	10.7319	0.5106	0.7176	1.104	1.48387	0.103871	1.38	0.5106	0.207	0.3864	0.276	14.81	15.9247	1.11473
Wet Rice Cultivation	WRC	Humid Mild Tropical	Bairabi	15-30	10.7308	0.2262	0.3354	0.4602	0.821053	0.0410526	0.78	0.2262	0.1092	0.1248	0.3198	8.37	8.81053	0.440526
Wet Rice Cultivation	WRC	Humid Mild Tropical	Bairabi	15-30	10.732	0.459	0.7038	1.1322	1.61053	0.0805263	1.53	0.459	0.2448	0.4284	0.3978	16.42	17.2842	0.864211	10.7316	1.30515	0.07515	1.23	0.3986	0.187	0.3132	0.3312	13.2	14.0065	0.806489
Wet Rice Cultivation	WRC	Humid Mild Tropical	Bairabi	30-45	12.6364	0.1254	0.2211	0.3168	0.358696	0.0286957	0.33	0.1254	0.0957	0.0957	0.0132	4.17	4.53261	0.362609
Wet Rice Cultivation	WRC	Humid Mild Tropical	Bairabi	30-45	12.625	0.2112	0.336	0.456	0.516129	0.036129	0.48	0.2112	0.1248	0.12	0.024	6.06	6.51613	0.456129
Wet Rice Cultivation	WRC	Humid Mild Tropical	Bairabi	30-45	12.6322	0.3393	0.5568	0.7395	0.988636	0.118636	0.87	0.3393	0.2175	0.1827	0.1305	10.99	12.4886	1.49864	12.6312	0.621154	0.0611537	0.56	0.2253	0.146	0.1328	0.0559	7.07333	7.84579	0.772458	42.8467	47.1213	4.27463
Wet Rice Cultivation	WRC	Temperate Sub Alpine	Champhai	0-15	9.17647	1.2546	1.9278	2.3562	3.32609	0.266087	3.06	1.2546	0.6732	0.4284	0.7038	28.08	30.5217	2.44174
Wet Rice Cultivation	WRC	Temperate Sub Alpine	Champhai	0-15	9.17667	1.41	2.13	2.79	3.15789	0.157895	3	1.41	0.72	0.66	0.21	27.53	28.9789	1.44895
Wet Rice Cultivation	WRC	Temperate Sub Alpine	Champhai	0-15	9.17845	1.3959	1.9602	2.4354	3.15957	0.189574	2.97	1.3959	0.5643	0.4752	0.5346	27.26	29	1.74	9.1772	3.21452	0.204519	3.01	1.3535	0.6525	0.5212	0.4828	27.6233	29.5002	1.8769
Wet Rice Cultivation	WRC	Temperate Sub Alpine	Champhai	15-30	9.23129	0.6174	0.8526	1.2642	1.56383	0.0938298	1.47	0.6174	0.2352	0.4116	0.2058	13.57	14.4362	0.86617
Wet Rice Cultivation	WRC	Temperate Sub Alpine	Champhai	15-30	9.23404	0.4089	0.6909	1.0998	1.48421	0.0742105	1.41	0.4089	0.282	0.4089	0.3102	13.02	13.7053	0.685263
Wet Rice Cultivation	WRC	Temperate Sub Alpine	Champhai	15-30	9.23188	0.4692	0.7176	0.9798	1.48387	0.103871	1.38	0.4692	0.2484	0.2622	0.4002	12.74	13.6989	0.958925	9.23241	1.51064	0.0906371	1.42	0.4985	0.2552	0.3609	0.3054	13.11	13.9468	0.836786
Wet Rice Cultivation	WRC	Temperate Sub Alpine	Champhai	30-45	9.62821	0.351	0.4758	0.663	0.847826	0.0678261	0.78	0.351	0.1248	0.1872	0.117	7.51	8.16304	0.653043
Wet Rice Cultivation	WRC	Temperate Sub Alpine	Champhai	30-45	9.63441	0.3441	0.6417	0.8091	1.04494	0.114944	0.93	0.3441	0.2976	0.1674	0.1209	8.96	10.0674	1.10742
Wet Rice Cultivation	WRC	Temperate Sub Alpine	Champhai	30-45	9.63889	0.3096	0.4752	0.6552	0.765957	0.0459574	0.72	0.3096	0.1656	0.18	0.0648	6.94	7.38298	0.442979	9.63383	0.886242	0.0762425	0.81	0.3349	0.196	0.1782	0.1009	7.80333	8.53781	0.734479	48.5367	51.9848	3.44816
Wet Rice Cultivation	WRC	Humid Sub Tropical	Zawlpui	0-15	9.86	1.38	1.89	2.49	3.26087	0.26087	3	1.38	0.51	0.6	0.51	29.58	32.1522	2.57217
Wet Rice Cultivation	WRC	Humid Sub Tropical	Zawlpui	0-15	9.85911	1.2222	1.9206	2.3862	3.26966	0.359663	2.91	1.2222	0.6984	0.4656	0.5238	28.69	32.236	3.54596
Wet Rice Cultivation	WRC	Humid Sub Tropical	Zawlpui	0-15	9.86111	1.2672	1.728	2.3328	3.31034	0.430345	2.88	1.2672	0.4608	0.6048	0.5472	28.4	32.6437	4.24368	9.86007	3.28029	0.350292	2.93	1.2898	0.5564	0.5568	0.527	28.89	32.3439	3.45394
Wet Rice Cultivation	WRC	Humid Sub Tropical	Zawlpui	15-30	9.76068	0.4797	0.702	0.9009	1.32955	0.159545	1.17	0.4797	0.2223	0.1989	0.2691	11.42	12.9773	1.55727
Wet Rice Cultivation	WRC	Humid Sub Tropical	Zawlpui	15-30	9.75833	0.444	0.696	0.888	1.2766	0.0765957	1.2	0.444	0.252	0.192	0.312	11.71	12.4574	0.747447
Wet Rice Cultivation	WRC	Humid Sub Tropical	Zawlpui	15-30	9.76068	0.3861	0.5499	0.702	1.34483	0.174828	1.17	0.3861	0.1638	0.1521	0.468	11.42	13.1264	1.70644	9.7599	1.31699	0.13699	1.18	0.4366	0.2127	0.181	0.3497	11.5167	12.8537	1.33705
Wet Rice Cultivation	WRC	Humid Sub Tropical	Zawlpui	30-45	9.76812	0.2691	0.4416	0.5658	0.726316	0.0363158	0.69	0.2691	0.1725	0.1242	0.1242	6.74	7.09474	0.354737
Wet Rice Cultivation	WRC	Humid Sub Tropical	Zawlpui	30-45	9.76812	0.3036	0.4968	0.621	0.784091	0.0940909	0.69	0.3036	0.1932	0.1242	0.069	6.74	7.65909	0.919091
Wet Rice Cultivation	WRC	Humid Sub Tropical	Zawlpui	30-45	9.77778	0.3024	0.468	0.5976	0.8	0.08	0.72	0.3024	0.1656	0.1296	0.1224	7.04	7.82222	0.782222	9.77134	0.770136	0.0701356	0.7	0.2917	0.1771	0.126	0.1052	6.84	7.52535	0.68535	47.2467	52.723	5.47634

## Sheet: Litter_Biomass_Stocks
	Leave biomass (Mg ha-1)		Twigs/ branch/bark biomass(Mg ha-1)		Leave biomass (Mg ha-1)
	1st year	2nd year	1st year	2nd year	1st year	2nd year
Forest	4	9.03	2.65	6.22	1.14	2.8
Agroforestry	2.72	6.59	1.01	3.12	0.92	1.8
Plantation	2.81	6.81	1	3	0.65	1.69
Wet rice	0.32	1.1
Jhum fallow	0.76	2.03	0.82	0.98
Current jhum	0.15	0.8
Grassland	1.52	2.35	1.03	1.16

## Sheet: Biomass_Accumulation_Rate Yr-1
	Leaves (Mg ha-1)	Twigs/ branch/bark (Mg ha-1)	Reproductive parts (Mg ha-1)
Forest	5.03	3.57	1.66
Agroforestry	3.87	2.11	0.88
Plantation	4	2	1.04
Wet rice	0.78
Jhum fallow	1.27	0.16
Current jhum	0.65
Grassland	0.83	0.13
